# Supplementary material for: Molecular adaptations underlying the beneficial effects of hydroxytyrosol in the pathogenic alterations induced by a high-fat diet in mouse liver: PPAR-α and Nrf2 activation, and NF-κB down-regulation
Source: Royal Society of Chemistry journal article supplement (doi:10.1039/c7fo00090a), 2017-01-01
Supplement: c7fo00090a1.pdf [file c7fo00090a1.pdf]

Supplementary Table 1. Gene specific primer sequences used in the study.

| mRNA           | Forward primer                  | Reverse primer                     |
|----------------|---------------------------------|------------------------------------|
| PPAR- $\alpha$ | CGG GAA AGA CCA GCA ACA AC      | TGG CAG CAG TGG AAG AAT CG         |
| NF- $\kappa$ B | GAG GTC TCT GGG GGT ACC AT      | AAG GCT GCC TGG ATC ACT TC         |
| TNF- $\alpha$  | ATG GCC TCC CTC TCA TCA GT      | TTT GCT ACG ACG TGG GCT AC         |
| ACOX-1         | GCT GAA TCA GGG CAC CAC T       | CCA AGT GAA GGT CCA AAG GC         |
| CPT-1          | CGA TCA TCA TGA CTA TGC GCT ACT | GCC GTG CTC TGC AAA CAT C          |
| IL-6           | TCC ATC CAG TTG CCT TCT TG      | TTC CAC GAT TTC CCA GAG AAC        |
| IL-1 $\beta$   | GAA GCA CCA GCA CAT TGC TTT     | GGA GCC TCA TGG CCC AAT TT         |
| GST            | AAG AAT GGA GCC TAT CCG GTG     | AGT CAT CCC GAG TTT TCA GAA        |
| GcLc           | ATG TGG ACA CCC GAT GCA GTA TT  | TGT CTT GCT TGT AGT CAG GAT GGT TT |
| $\beta$ -actin | ACTGCCGCATCCTCTTCCTC            | CTCCTGCTTGCTGATCCACATC             |

Sequences are listed in the 5'  $\rightarrow$  3' direction.
